# Supplementary material for: A comparison of experimental and theoretical studies of benzoquinone modified poly(thiophene): effect of polymerization techniques on the structure and properties
Source: Royal Society of Chemistry journal article supplement (doi:10.1039/d0ra07714c), 2020-01-01
Supplement: d0ra07714c1.pdf [file d0ra07714c1.pdf]

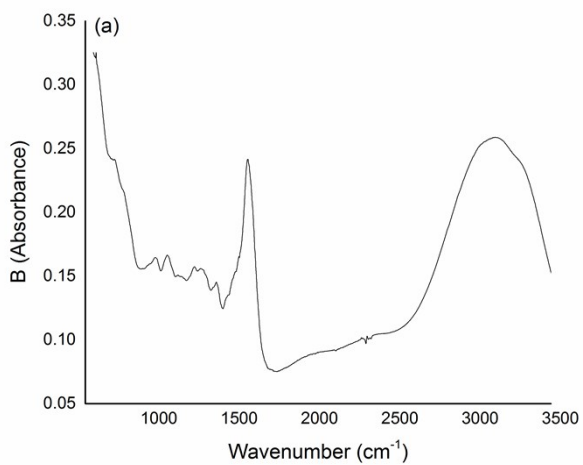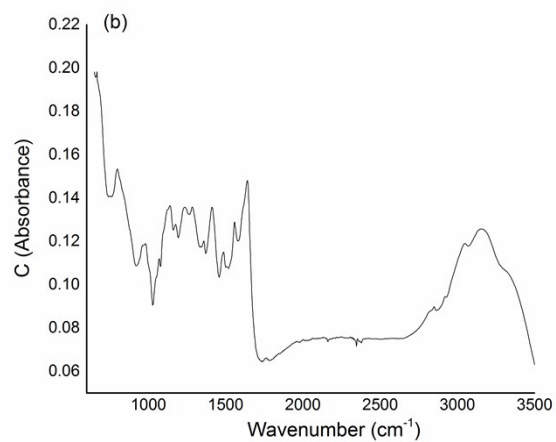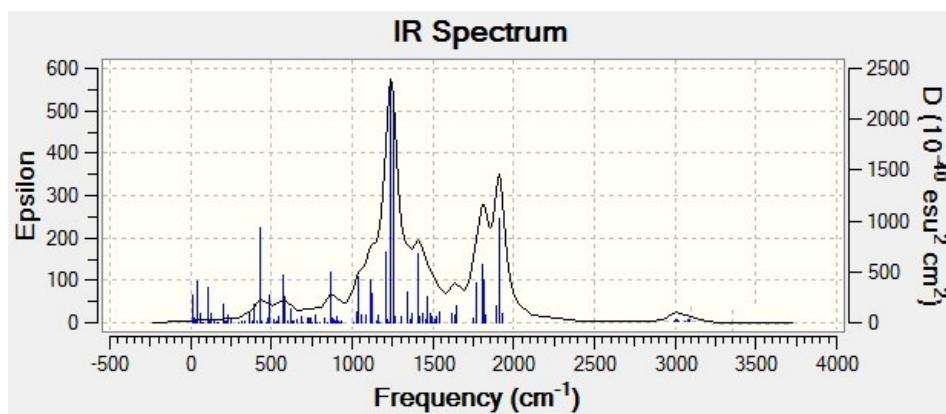

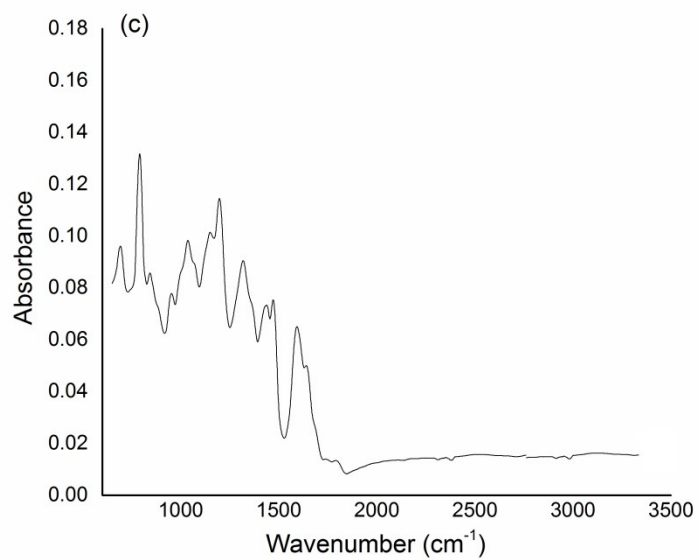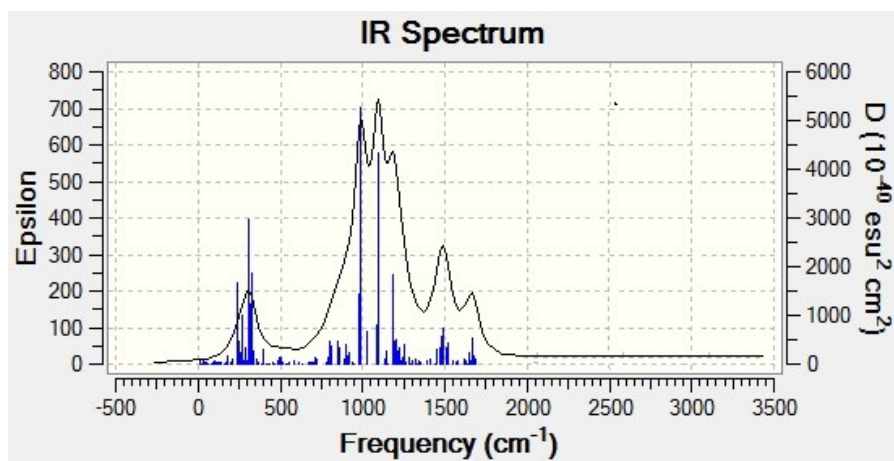

Figure S1 FTIR spectra of (a) PTh/BQ/MS (b) PTh/BQ/US, (c) PTh/BQ-MW

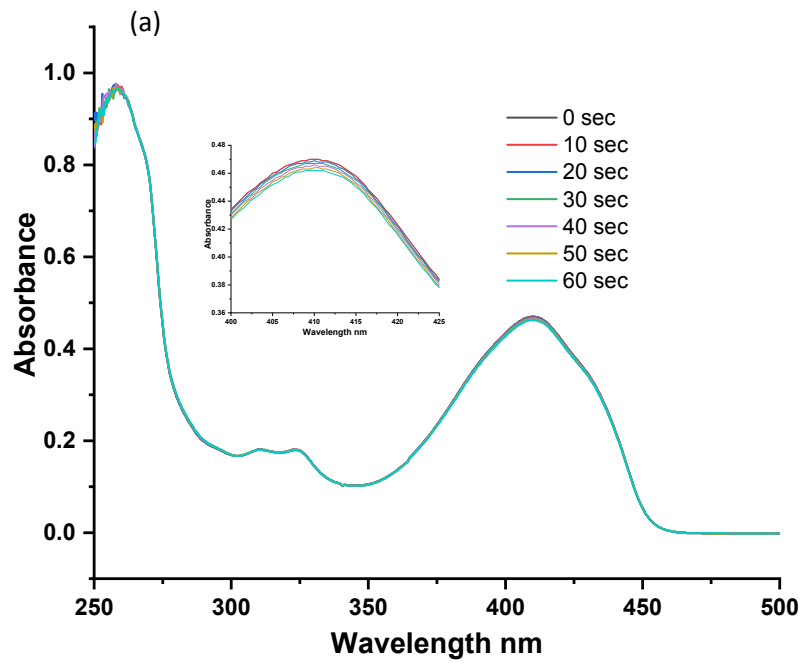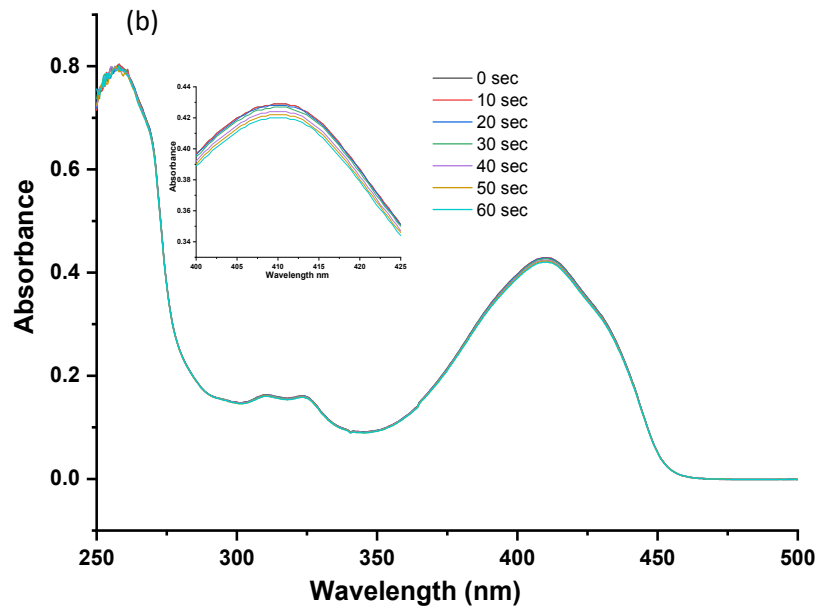

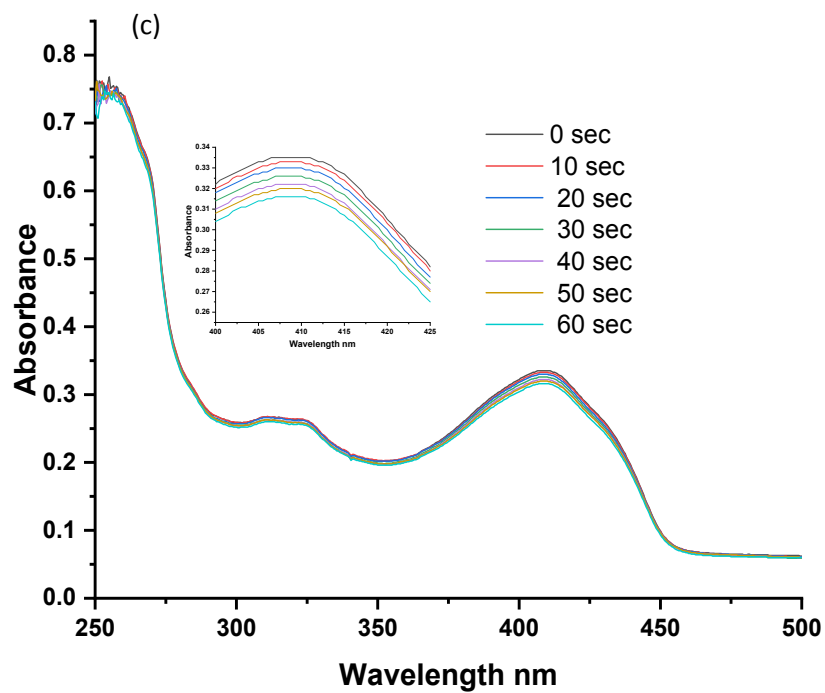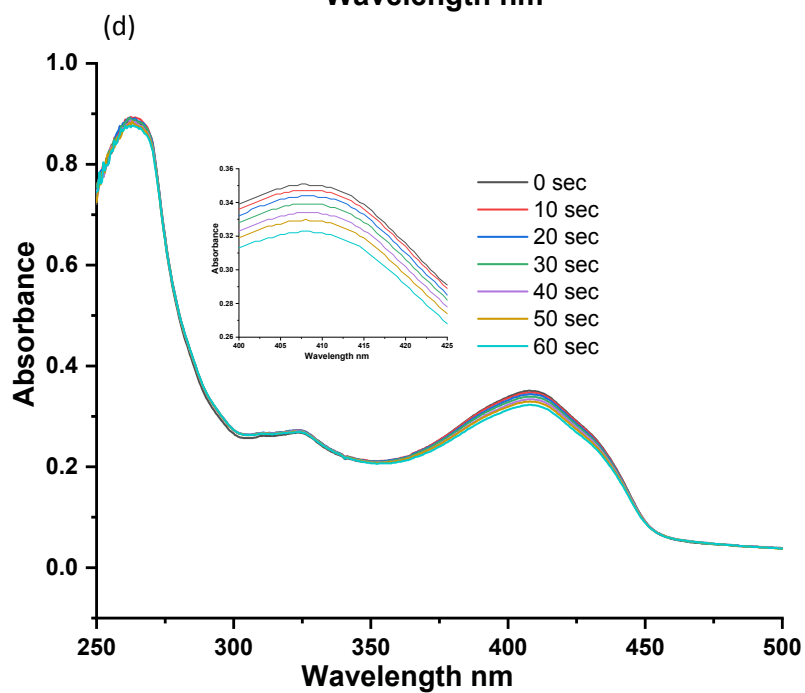

Figure S2 UV-visible spectra of DPBF (a) blank (b) PTh/BQ-MS, (c) PTh/BQ-US, (d) PTh/BQ-MW
